# Supplementary material for: Vibrational spectra of Pb2Bi2Te3, PbBi2Te4, and PbBi4Te7 topological insulators: temperature-dependent Raman and theoretical insights from DFT simulations
Source: Royal Society of Chemistry journal article supplement (doi:10.1039/c9cp01494b), 2019-01-01
Supplement: c9cp01494b1.pdf [file c9cp01494b1.pdf]

## Supplementary information

### **Vibrational Spectra of $\text{Pb}_2\text{Bi}_2\text{Te}_3$ , $\text{PbBi}_2\text{Te}_4$ and $\text{PbBi}_4\text{Te}_7$ Topological Insulators: Temperature Dependent Raman and Theoretical Insight from DFT Simulations**

Privanath Mal<sup>a</sup>, G. Bera<sup>a</sup>, G. R. Turpu<sup>a</sup>, Sunil K. Srivastava<sup>b</sup>, A. Gangan<sup>c</sup>, Brahmananda Chakraborty<sup>\*c</sup>, Bipul Das<sup>d</sup> and Pradip Das<sup>\*a</sup>

<sup>a</sup> Department of Pure Applied Physics, Guru Ghasidas Vishwavidyalaya, Koni, Bilaspur-495009, India.  
E-mail: pradipd.iitb@gmail.com

<sup>b</sup> Department of Physics, Mahtma Gandhi Central University, East Champaran, Motihari, Bihar-845401, India.

<sup>c</sup> High Pressure and Synchrotron Radiation Physics Division, Bhabha Atomic Research Centre, Trombay, Mumbai-40008, India.

E-mail: brahma@barc.gov.in

<sup>d</sup> Department of Physics, National Changhua University of Education, Jin-De Road, Changhua 500, Taiwan.

| Entry | Content           | Page no. |
|-------|-------------------|----------|
| 01    | Thickness         | S2       |
| 02    | EDAX              | S3       |
| 03    | Band structure    | S4       |
| 04    | Phonon dispersion | S5       |
| 05    | Character table   | S6-S7    |



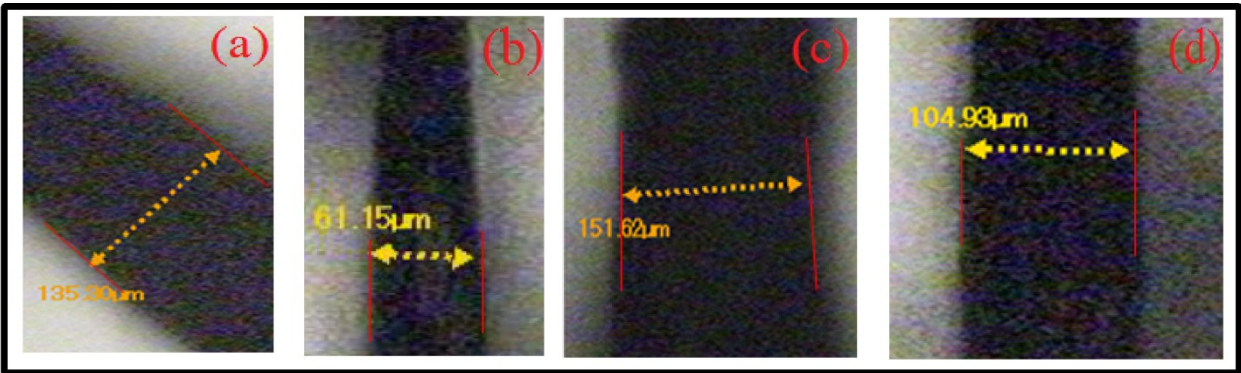

**Fig. S1** Thickness of (a) Bi<sub>2</sub>Te<sub>3</sub>, (b) Pb<sub>2</sub>Bi<sub>2</sub>Te<sub>3</sub>, (c) PbBi<sub>2</sub>Te<sub>4</sub> and (d) PbBi<sub>4</sub>Te<sub>7</sub> single crystal flakes measured through optical microscope.

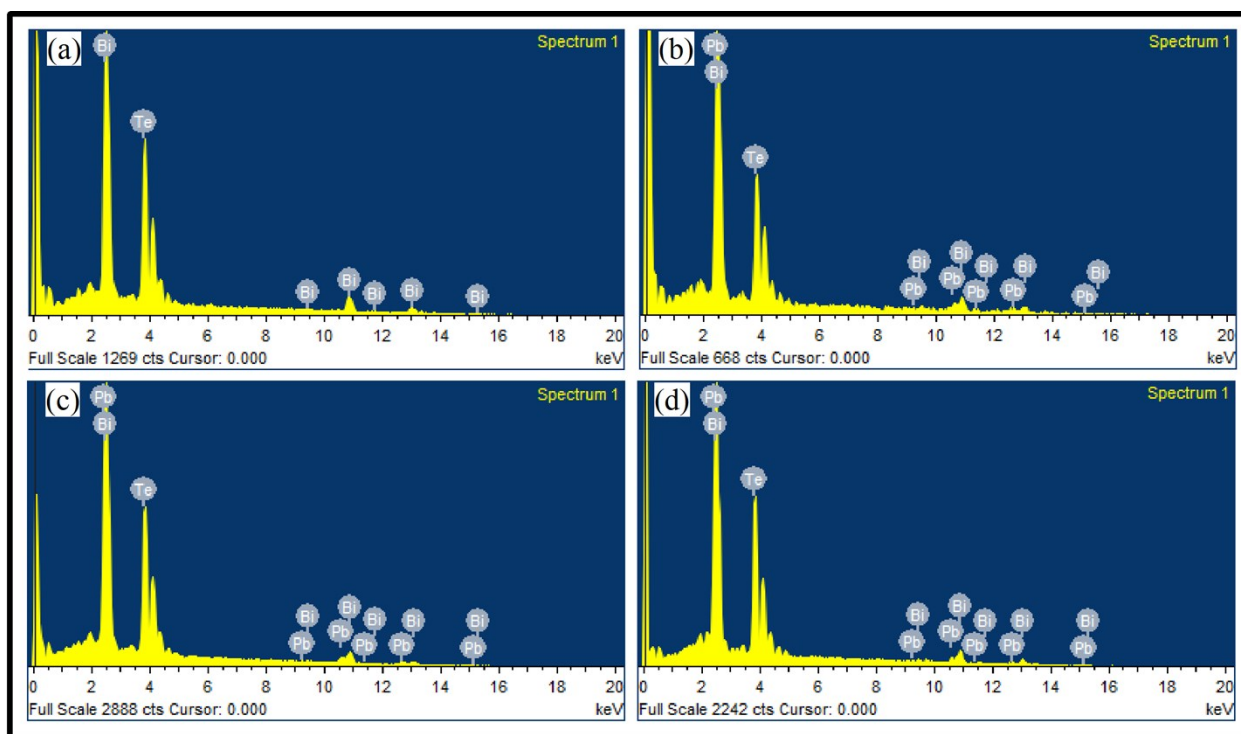

| Specimen                                        | Weight (%)  |              |
|-------------------------------------------------|-------------|--------------|
|                                                 | Theoretical | Experimental |
| Bi <sub>2</sub> Te <sub>3</sub>                 | Bi: 52.19   | Bi: 52.25    |
|                                                 | Te: 47.80   | Te: 47.75    |
| Pb <sub>2</sub> Bi <sub>2</sub> Te <sub>3</sub> | Pb: 34.10   | Pb: 33.83    |
|                                                 | Bi: 34.40   | Bi: 34.43    |

|                                   |                                     |                                     |
|-----------------------------------|-------------------------------------|-------------------------------------|
|                                   | Te: 31.49                           | Te: 31.74                           |
| PbBi <sub>2</sub> Te <sub>4</sub> | Pb: 19.31<br>Bi: 36.57<br>Te: 45.11 | Pb: 19.31<br>Bi: 35.73<br>Te: 44.96 |
| PbBi <sub>4</sub> Te <sub>7</sub> | Pb: 10.70<br>Bi: 43.17<br>Te: 46.12 | Pb: 10.11<br>Bi: 43.16<br>Te: 46.73 |

**Fig. S2** EDAX spectra for (a) Bi<sub>2</sub>Te<sub>3</sub>, (b) Pb<sub>2</sub>Bi<sub>2</sub>Te<sub>3</sub>, (c) PbBi<sub>2</sub>Te<sub>4</sub> and (d) PbBi<sub>4</sub>Te<sub>7</sub> single crystal flakes.

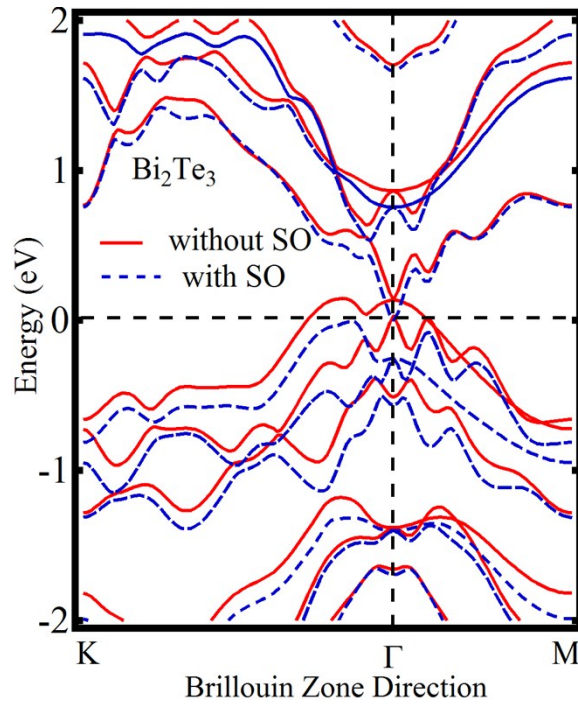

**Fig. S3** Band structure of Bi<sub>2</sub>Te<sub>3</sub> with and without spin-orbit interactions; the band structure of Bi<sub>2</sub>Te<sub>3</sub> film is resolved correctly when including spin-orbit effect and the Dirac cone is observed at the Γ point in the Brillouin zone.

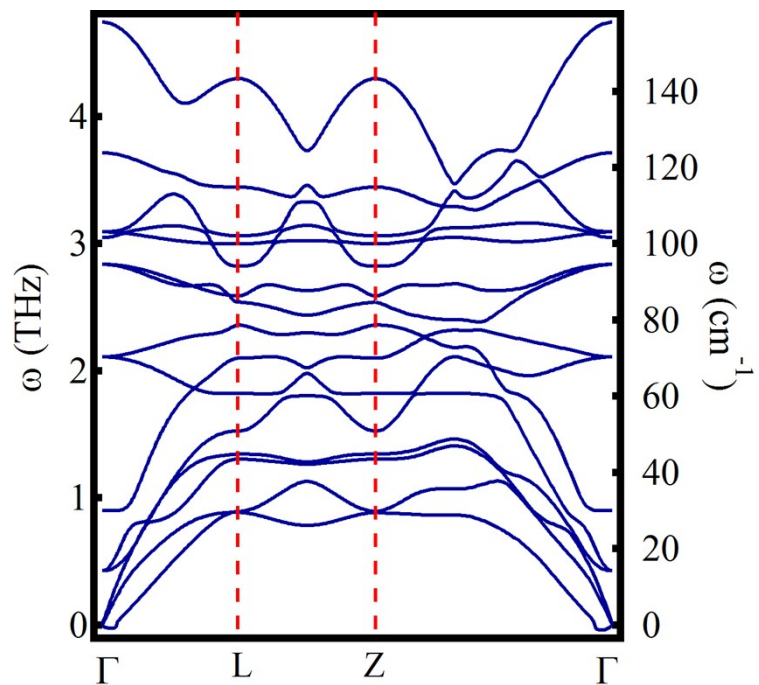

**Fig. S4** Phonon frequencies of Bi<sub>2</sub>Te<sub>3</sub> in the Brillouin zone direction; there are no negative frequencies which reflect the stability.

## Character table

### 1. $\text{Bi}_2\text{Te}_3$

point group  $D_{3d} (-3m)$   
there are 6 classes  
the character table:

|                 | E    | 2C3   | 3C2'  | i     | 2S6   | 3s <sub>d</sub> |
|-----------------|------|-------|-------|-------|-------|-----------------|
| A <sub>1g</sub> | 1.00 | 1.00  | 1.00  | 1.00  | 1.00  | 1.00            |
| A <sub>2g</sub> | 1.00 | 1.00  | -1.00 | 1.00  | 1.00  | -1.00           |
| E <sub>g</sub>  | 2.00 | -1.00 | 0.00  | 2.00  | -1.00 | 0.00            |
| A <sub>1u</sub> | 1.00 | 1.00  | 1.00  | -1.00 | -1.00 | -1.00           |
| A <sub>2u</sub> | 1.00 | 1.00  | -1.00 | -1.00 | -1.00 | 1.00            |
| E <sub>u</sub>  | 2.00 | -1.00 | 0.00  | -2.00 | 1.00  | 0.00            |

Mode symmetry,  $D_{3d} (-3m)$  point group:

|                   |       |        |                                      |   |
|-------------------|-------|--------|--------------------------------------|---|
| freq ( 1 - 1) =   | 3.5   | [cm-1] | --> A <sub>2u</sub> L <sub>2</sub> ' | I |
| freq ( 2 - 3) =   | 8.0   | [cm-1] | --> E <sub>u</sub> L <sub>3</sub> '  | I |
| freq ( 4 - 5) =   | 38.1  | [cm-1] | --> E <sub>g</sub> L <sub>3</sub>    | R |
| freq ( 6 - 6) =   | 56.3  | [cm-1] | --> A <sub>1g</sub> L <sub>1</sub>   | R |
| freq ( 7 - 8) =   | 63.7  | [cm-1] | --> E <sub>u</sub> L <sub>3</sub> '  | I |
| freq ( 9 - 10) =  | 97.4  | [cm-1] | --> E <sub>u</sub> L <sub>3</sub> '  | I |
| freq ( 11 - 11) = | 102.5 | [cm-1] | --> A <sub>2u</sub> L <sub>2</sub> ' | I |
| freq ( 12 - 13) = | 105.1 | [cm-1] | --> E <sub>g</sub> L <sub>3</sub>    | R |
| freq ( 14 - 14) = | 127.5 | [cm-1] | --> A <sub>2u</sub> L <sub>2</sub> ' | I |
| freq ( 15 - 15) = | 135.9 | [cm-1] | --> A <sub>1g</sub> L <sub>1</sub>   | R |

### 2. $\text{PbBi}_4\text{Te}_7$

point group  $D_{3d} (-3m)$

there are 6 classes  
the character table:

|                 | E    | 2C3   | 3C2'  | i     | 2S6   | 3s <sub>d</sub> |
|-----------------|------|-------|-------|-------|-------|-----------------|
| A <sub>1g</sub> | 1.00 | 1.00  | 1.00  | 1.00  | 1.00  | 1.00            |
| A <sub>2g</sub> | 1.00 | 1.00  | -1.00 | 1.00  | 1.00  | -1.00           |
| E <sub>g</sub>  | 2.00 | -1.00 | 0.00  | 2.00  | -1.00 | 0.00            |
| A <sub>1u</sub> | 1.00 | 1.00  | 1.00  | -1.00 | -1.00 | -1.00           |
| A <sub>2u</sub> | 1.00 | 1.00  | -1.00 | -1.00 | -1.00 | 1.00            |
| E <sub>u</sub>  | 2.00 | -1.00 | 0.00  | -2.00 | 1.00  | 0.00            |

Mode symmetry, D<sub>3d</sub> (-3m) point group:

|                   |       |        |                                      |   |
|-------------------|-------|--------|--------------------------------------|---|
| freq ( 1 - 2) =   | -4.8  | [cm-1] | --> E <sub>u</sub> L <sub>3</sub> '  | I |
| freq ( 3 - 3) =   | -2.2  | [cm-1] | --> A <sub>2u</sub> L <sub>2</sub> ' | I |
| freq ( 4 - 5) =   | 6.1   | [cm-1] | --> E <sub>u</sub> L <sub>3</sub> '  | I |
| freq ( 6 - 6) =   | 9.4   | [cm-1] | --> A <sub>2u</sub> L <sub>2</sub> ' | I |
| freq ( 7 - 8) =   | 19.9  | [cm-1] | --> E <sub>g</sub> L <sub>3</sub>    | R |
| freq ( 9 - 10) =  | 34.2  | [cm-1] | --> E <sub>u</sub> L <sub>3</sub> '  | I |
| freq ( 11 - 12) = | 36.3  | [cm-1] | --> E <sub>g</sub> L <sub>3</sub>    | R |
| freq ( 13 - 13) = | 37.9  | [cm-1] | --> A <sub>1g</sub> L <sub>1</sub>   | R |
| freq ( 14 - 14) = | 53.8  | [cm-1] | --> A <sub>1g</sub> L <sub>1</sub>   | R |
| freq ( 15 - 16) = | 59.3  | [cm-1] | --> E <sub>u</sub> L <sub>3</sub> '  | I |
| freq ( 17 - 18) = | 68.6  | [cm-1] | --> E <sub>u</sub> L <sub>3</sub> '  | I |
| freq ( 19 - 19) = | 75.2  | [cm-1] | --> A <sub>2u</sub> L <sub>2</sub> ' | I |
| freq ( 20 - 21) = | 77.6  | [cm-1] | --> E <sub>g</sub> L <sub>3</sub>    | R |
| freq ( 22 - 23) = | 91.8  | [cm-1] | --> E <sub>u</sub> L <sub>3</sub> '  | I |
| freq ( 24 - 25) = | 93.0  | [cm-1] | --> E <sub>g</sub> L <sub>3</sub>    | R |
| freq ( 26 - 27) = | 98.1  | [cm-1] | --> E <sub>u</sub> L <sub>3</sub> '  | I |
| freq ( 28 - 29) = | 103.9 | [cm-1] | --> E <sub>g</sub> L <sub>3</sub>    | R |
| freq ( 30 - 30) = | 109.2 | [cm-1] | --> A <sub>2u</sub> L <sub>2</sub> ' | I |
| freq ( 31 - 31) = | 110.4 | [cm-1] | --> A <sub>1g</sub> L <sub>1</sub>   | R |
| freq ( 32 - 32) = | 113.3 | [cm-1] | --> A <sub>2u</sub> L <sub>2</sub> ' | I |
| freq ( 33 - 33) = | 136.9 | [cm-1] | --> A <sub>2u</sub> L <sub>2</sub> ' | I |
| freq ( 34 - 34) = | 139.0 | [cm-1] | --> A <sub>2u</sub> L <sub>2</sub> ' | I |
| freq ( 35 - 35) = | 139.2 | [cm-1] | --> A <sub>1g</sub> L <sub>1</sub>   | R |
| freq ( 36 - 36) = | 142.5 | [cm-1] | --> A <sub>1g</sub> L <sub>1</sub>   | R |
